# Supplementary material
Source: Springer Nature journal article supplement (https://www.springermedizin.de/resource/supplementary/13023_2013_628_MOESM5_ESM.pdf/9642548)

■ DNAs/RNAs ■ Tissues ■ Cell lines ■ Others

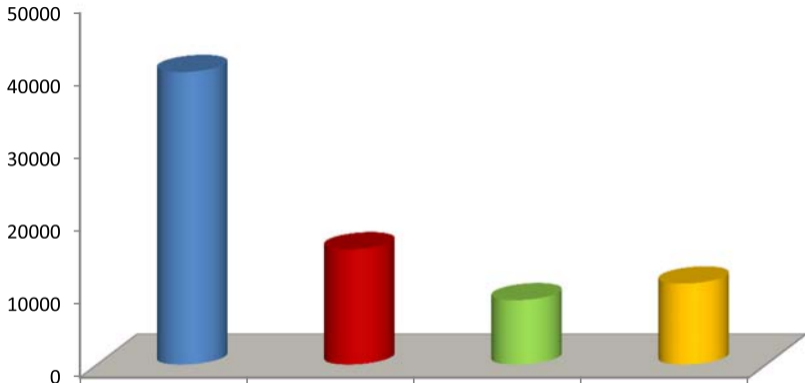

Updated: 2012 Dec

DNAs/RNAs

40114

Tissues

15830

Cell lines

8848

Others

11124

Supplement: MOESM5 [file 9642548]
